# Supplementary material for: Synthesis of self-assembled nucleobases and their anhydrous proton conductivity
Source: Royal Society of Chemistry journal article supplement (doi:10.1039/c9ra06841d), 2019-01-01
Supplement: c9ra06841d1.pdf [file c9ra06841d1.pdf]

## Supporting Information

Synthesis of self-assembled nucleobase and its anhydrous proton conductivity

Masanori Yamada\* and Kento Tanoue

Department of Chemistry, Faculty of Science, Okayama University of Science, Ridaicho,

Okayama 700-0005, Japan

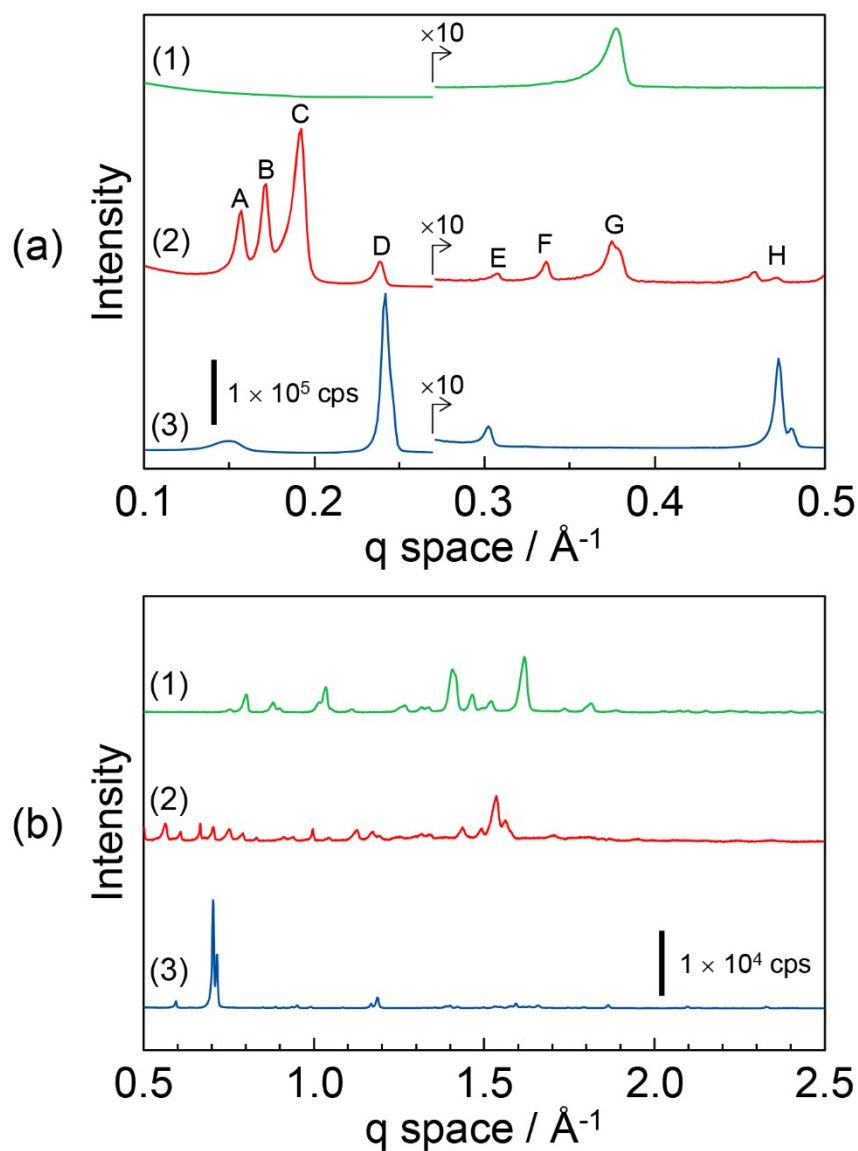

**Figure S1.** The q space ( $2\pi/d$ -spacing) of (1) DOT material, (2) DOT-40 mol% MDP composite material, and (3) MDP material. (a) and (b) show the q space in the low- and high-angle regions, respectively. The q space was calculated from the d-spacing.

**Table S1.** The q space of DOT-40 mol% MDP composite material. The q space was calculated from d-spacing. The entry A – H shows the diffraction peaks in Figure S1.

| entry | q space / $\text{\AA}^{-1}$ |
|-------|-----------------------------|
| A     | 0.1559                      |
| B     | 0.1704                      |
| C     | 0.1922                      |
| D     | 0.2382                      |
| E     | 0.3083                      |
| F     | 0.3386                      |
| G     | 0.3809                      |
| H     | 0.4751                      |
